# Supplementary material for: Unique roles of co-receptor-bound LCK in helper and cytotoxic T cells
Source: PubMed Central journal article supplement (PMC9810533; doi:10.1038/s41590-022-01366-0), 2022-12-23

Source Data Figure 7

LckWT

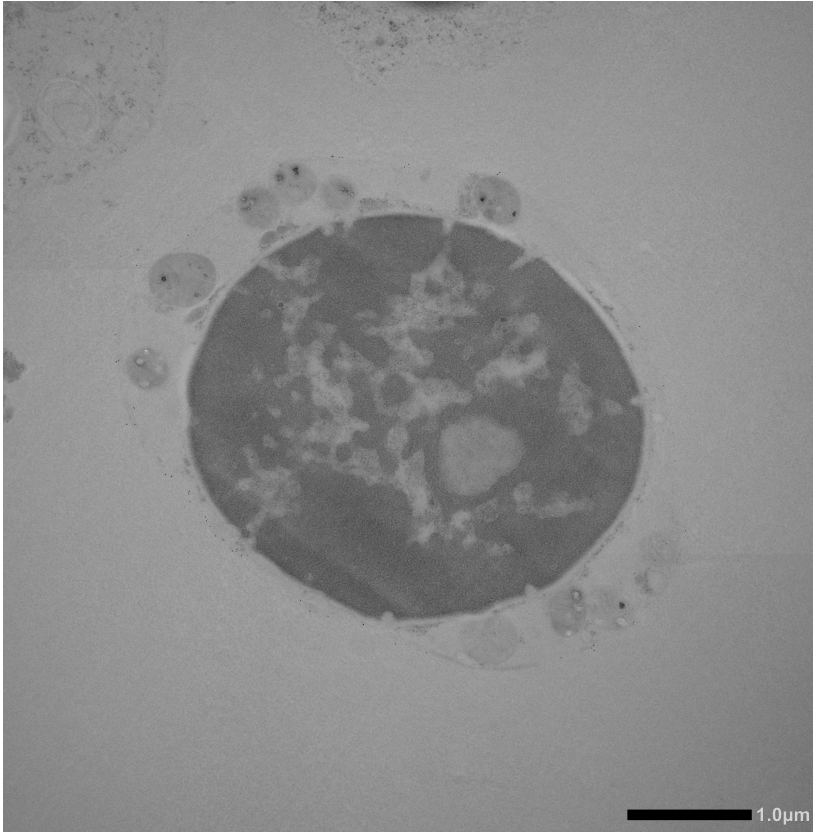

LckCA

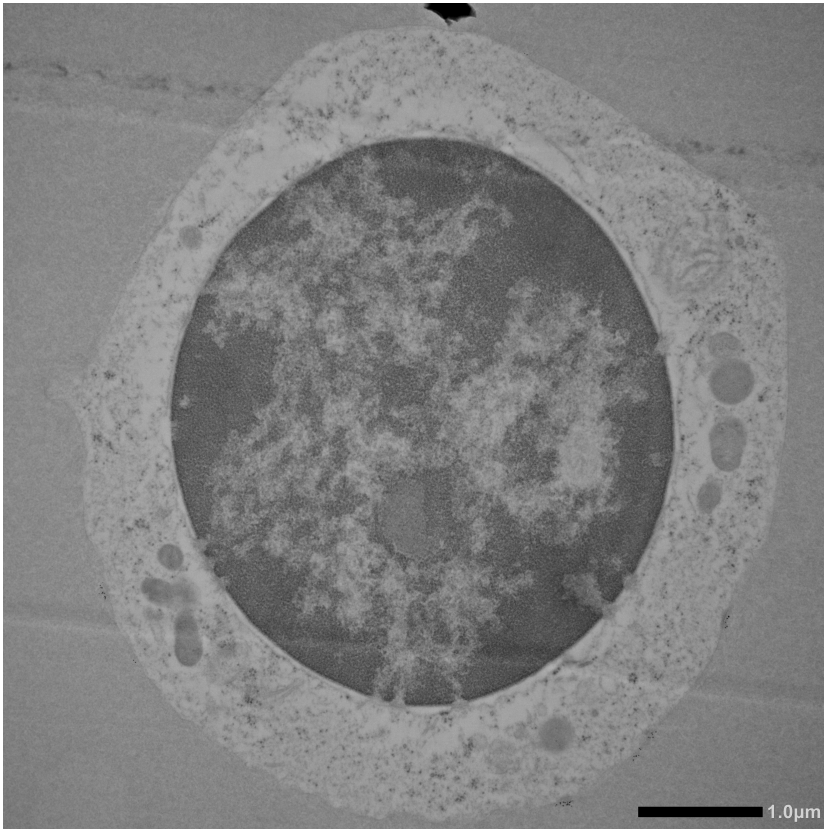

Supplement: 41590_2022_1366_MOESM12_ESM.pdf [file 41590_2022_1366_MOESM12_ESM.pdf]
