# Supplementary material for: Unique roles of co-receptor-bound LCK in helper and cytotoxic T cells
Source: PubMed Central journal article supplement (PMC9810533; doi:10.1038/s41590-022-01366-0), 2022-12-23

**ExtData1c**

THYMUS: Loading: WT, CA, CA/KR, KR, KO

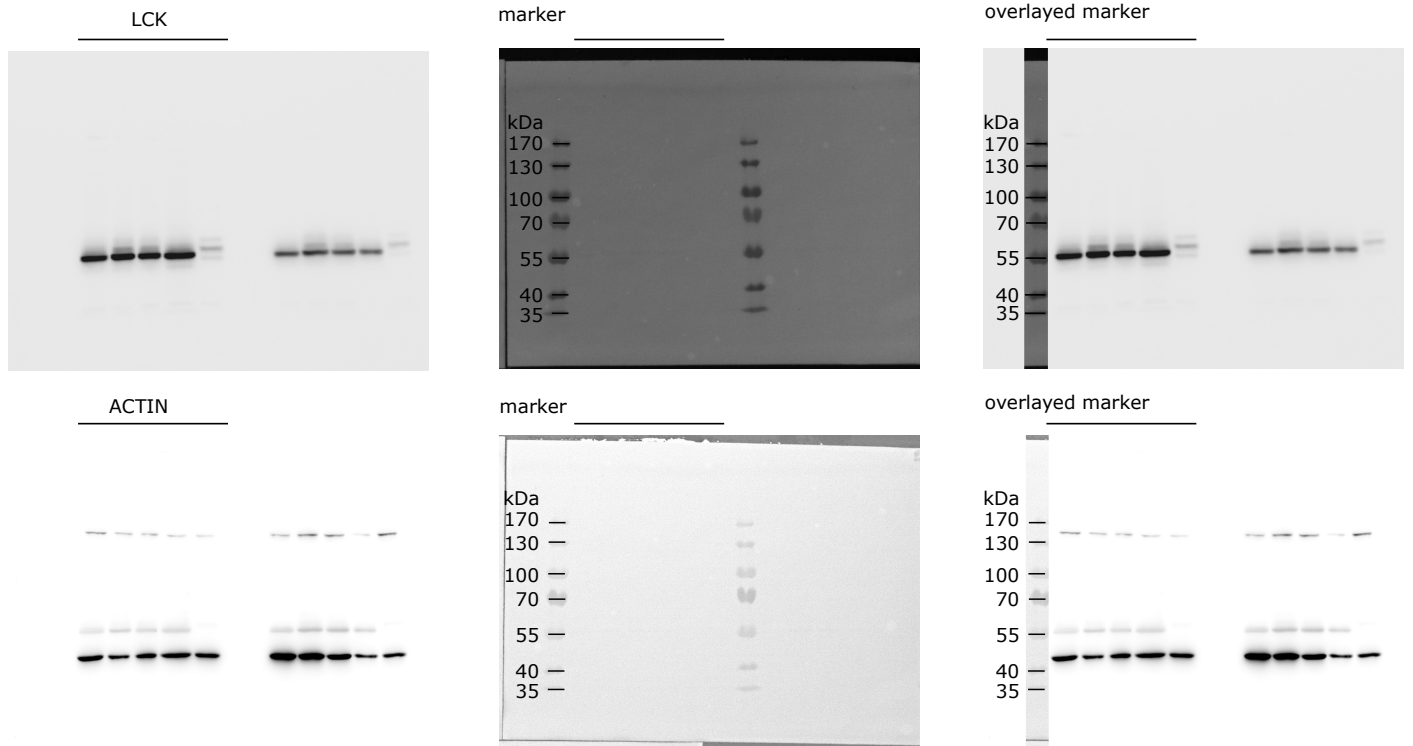

Lymph Nodes: Loading: WT, CA, CA/KR, KO, KR

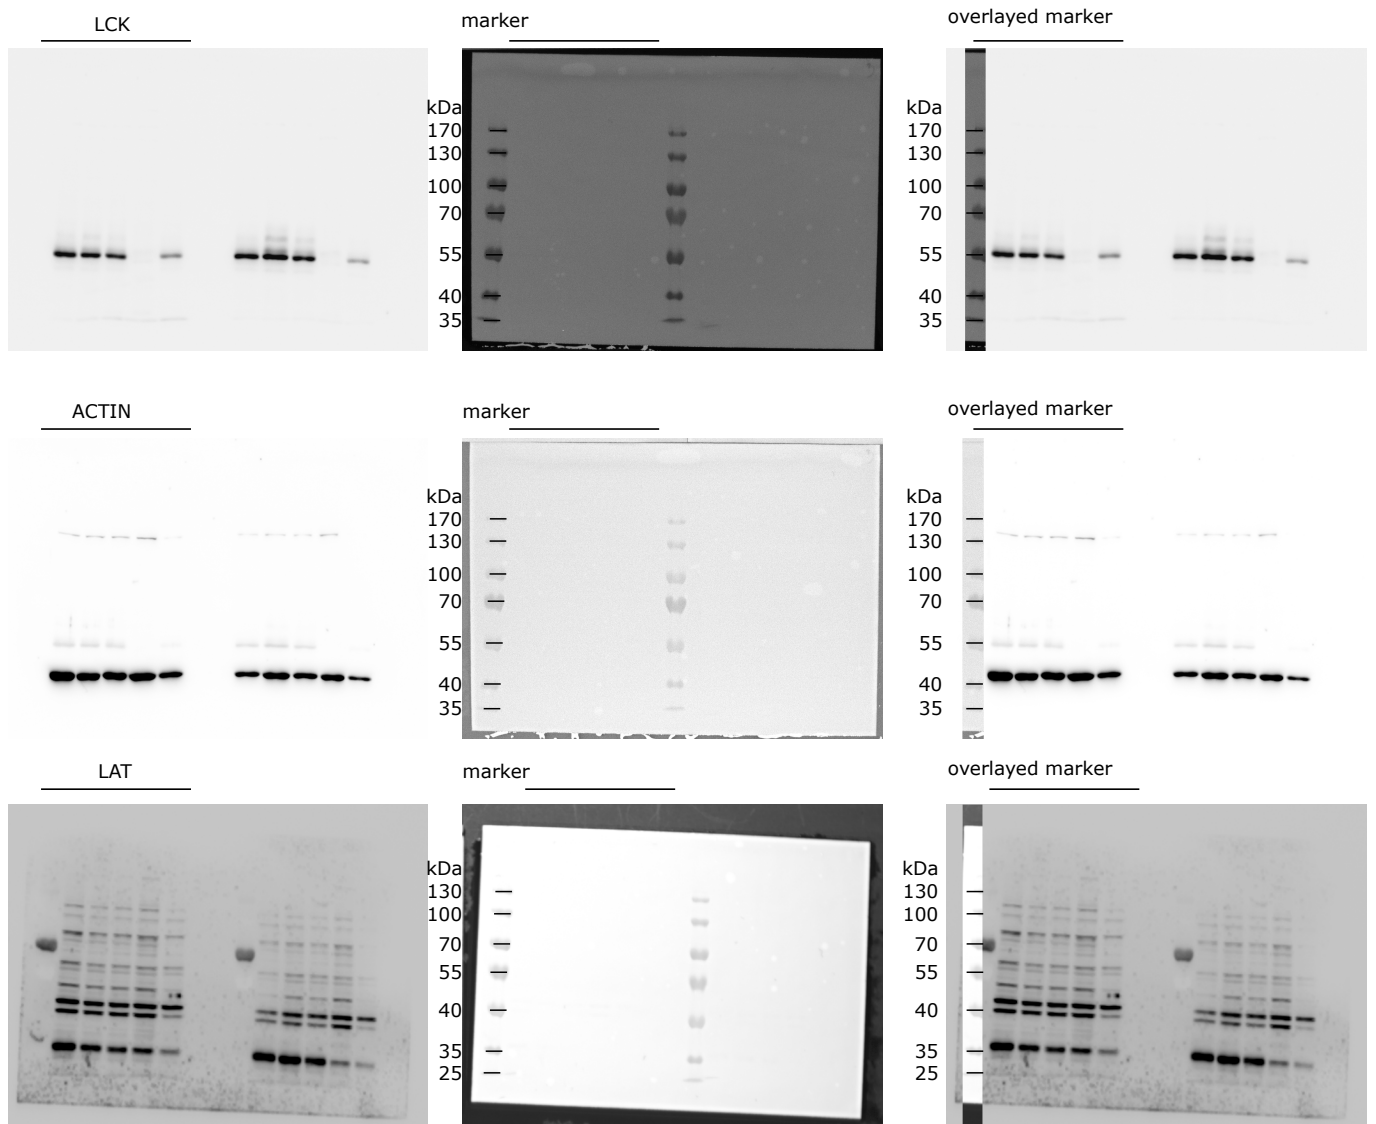

**ExtData1d**

THYMUS CD4-IP: Loading: WT, CA, CA/KR, KR, KO

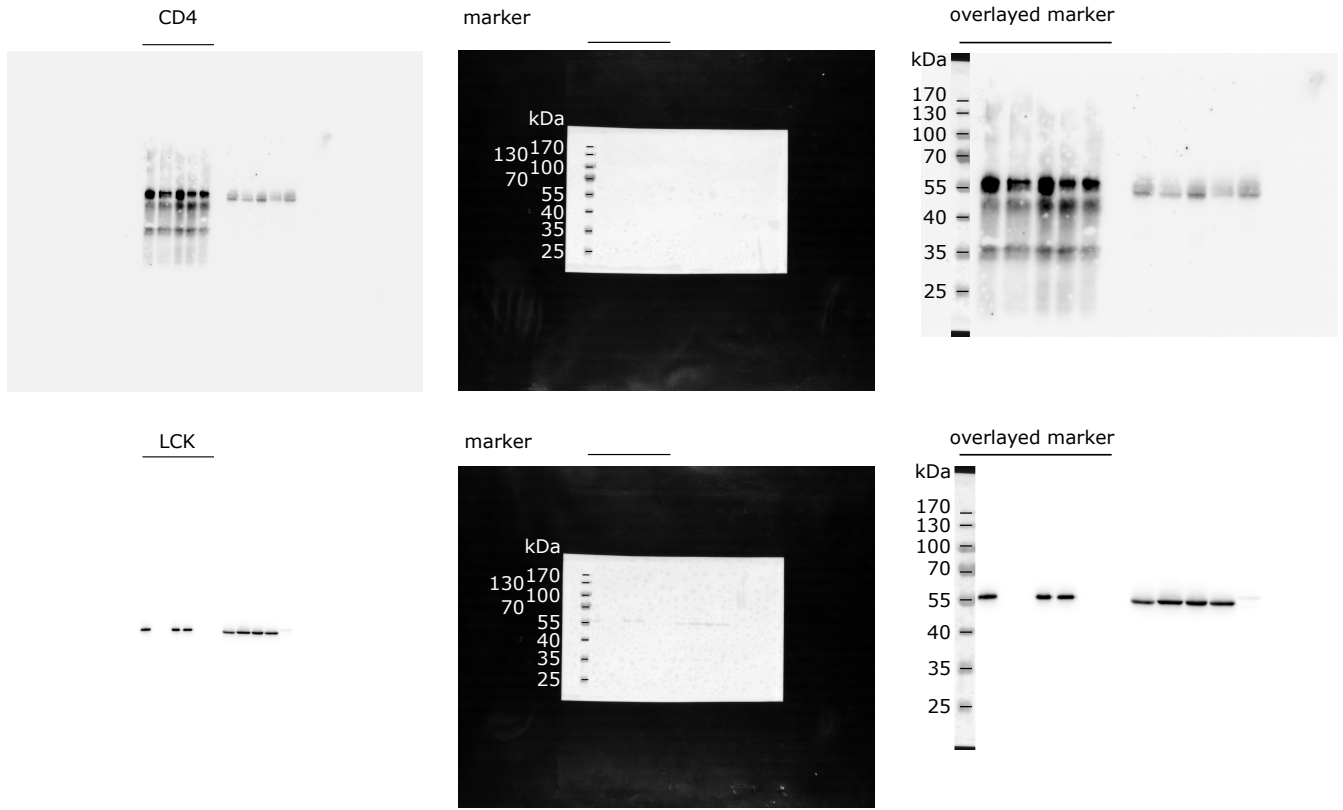

**ExtData1e**

THYMUS CD8b-IP: Loading: WT, CA, CA/KR, KR, KO

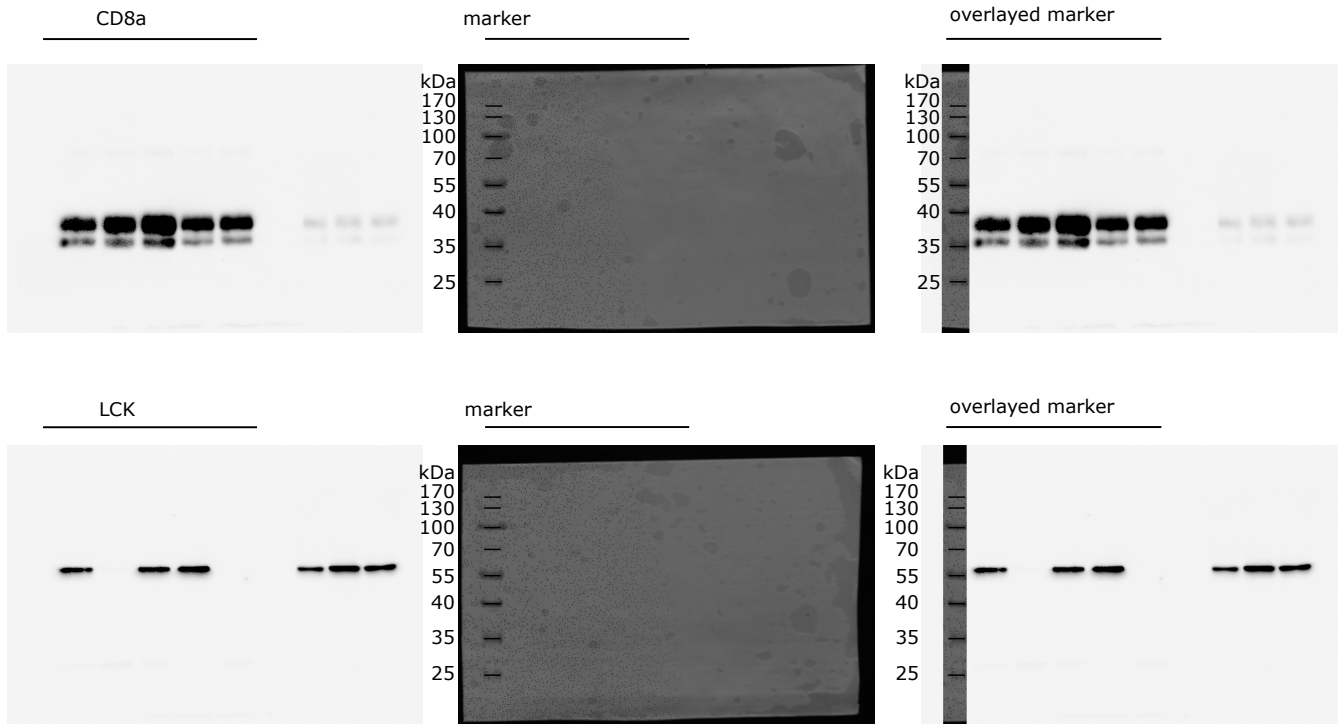

Supplement: 41590_2022_1366_MOESM13_ESM.pdf [file 41590_2022_1366_MOESM13_ESM.pdf]
