# Supplementary material for: Unique roles of co-receptor-bound LCK in helper and cytotoxic T cells
Source: PubMed Central journal article supplement (PMC9810533; doi:10.1038/s41590-022-01366-0), 2022-12-23

**ExtData2a**

HEK293: loading

|                  |   |   |    |    |    |    |
|------------------|---|---|----|----|----|----|
| LCK              | - | - | WT | CA | KR | WT |
| CD25-TCR $\zeta$ | - | + | +  | +  | +  | -  |
| e.v.             | - | + | -  | -  | -  | +  |

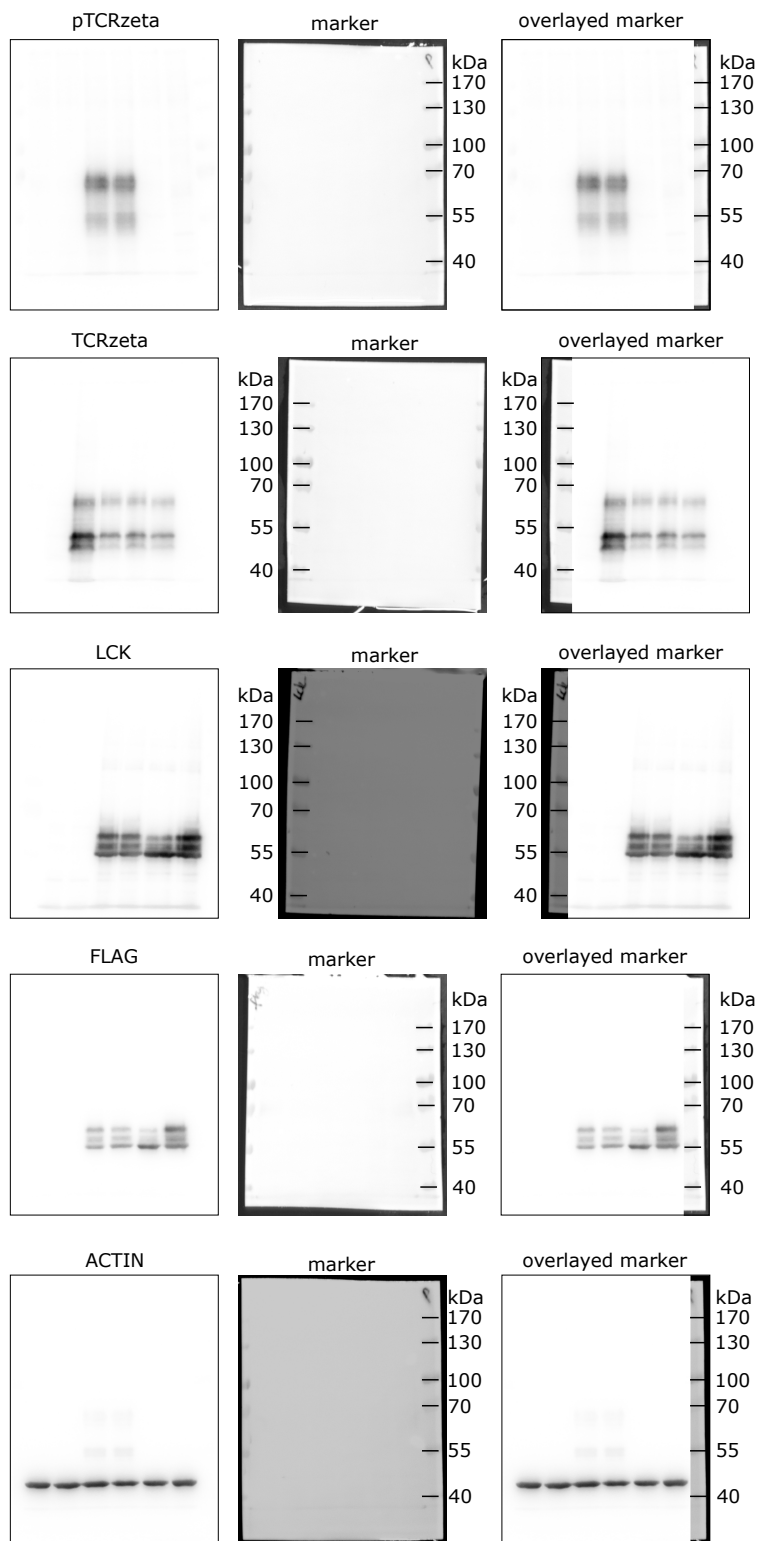

**ExtData2b**

HEK293: loading

|       |   |   |    |    |    |    |
|-------|---|---|----|----|----|----|
| LCK   | - | - | WT | CA | KR | WT |
| ZAP70 | - | + | +  | +  | +  | -  |
| e.v.  | - | + | -  | -  | -  | +  |

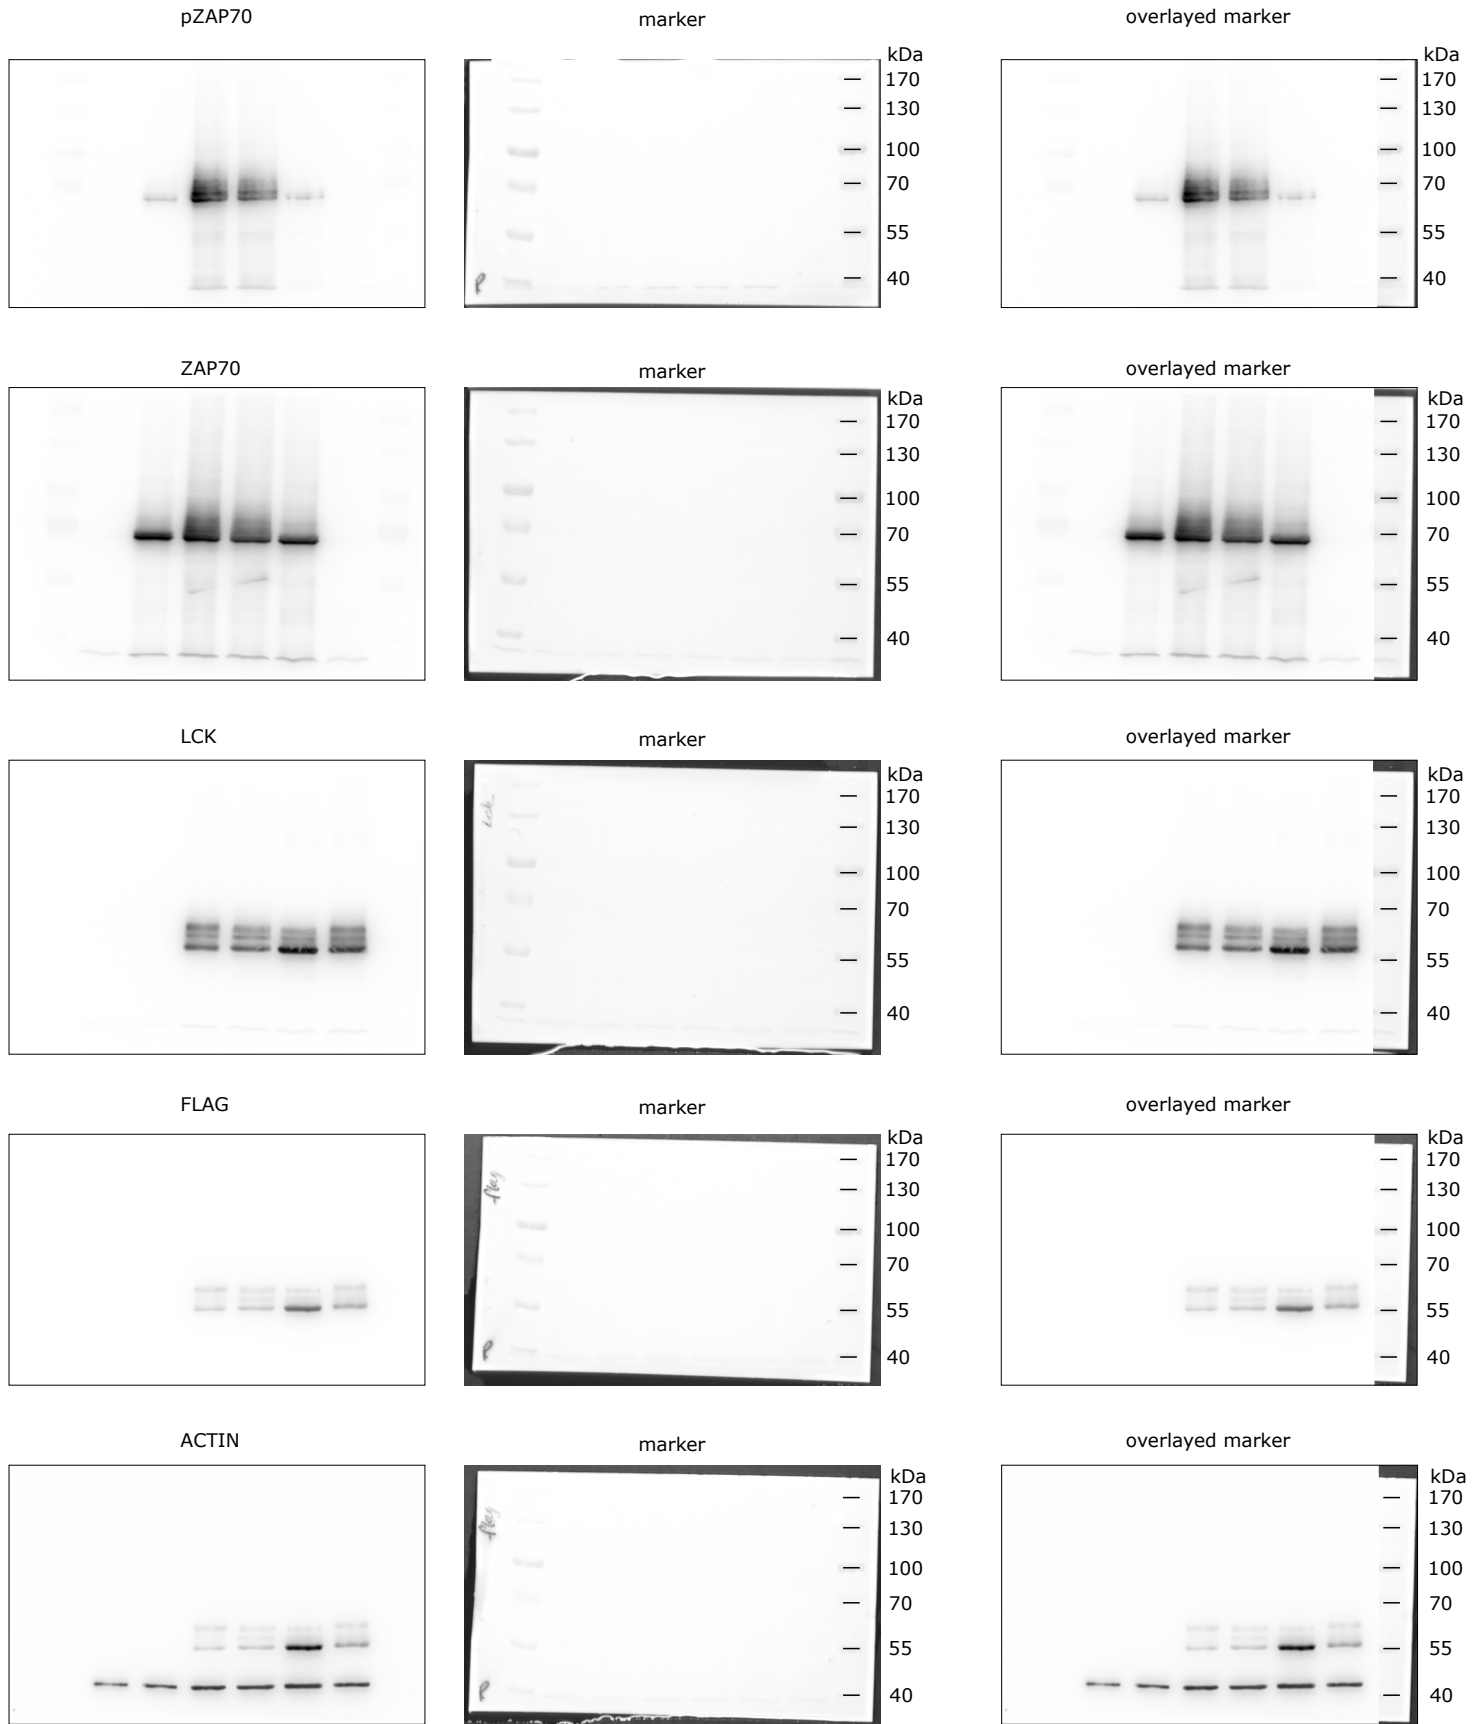

**ExtData2c**

|                 |      |   |    |    |    |   |    |    |    |
|-----------------|------|---|----|----|----|---|----|----|----|
| Jurkat: loading | LCK  | - | WT | CA | KR | - | WT | CA | KR |
|                 | c305 | - | -  | -  | -  | + | +  | +  | +  |

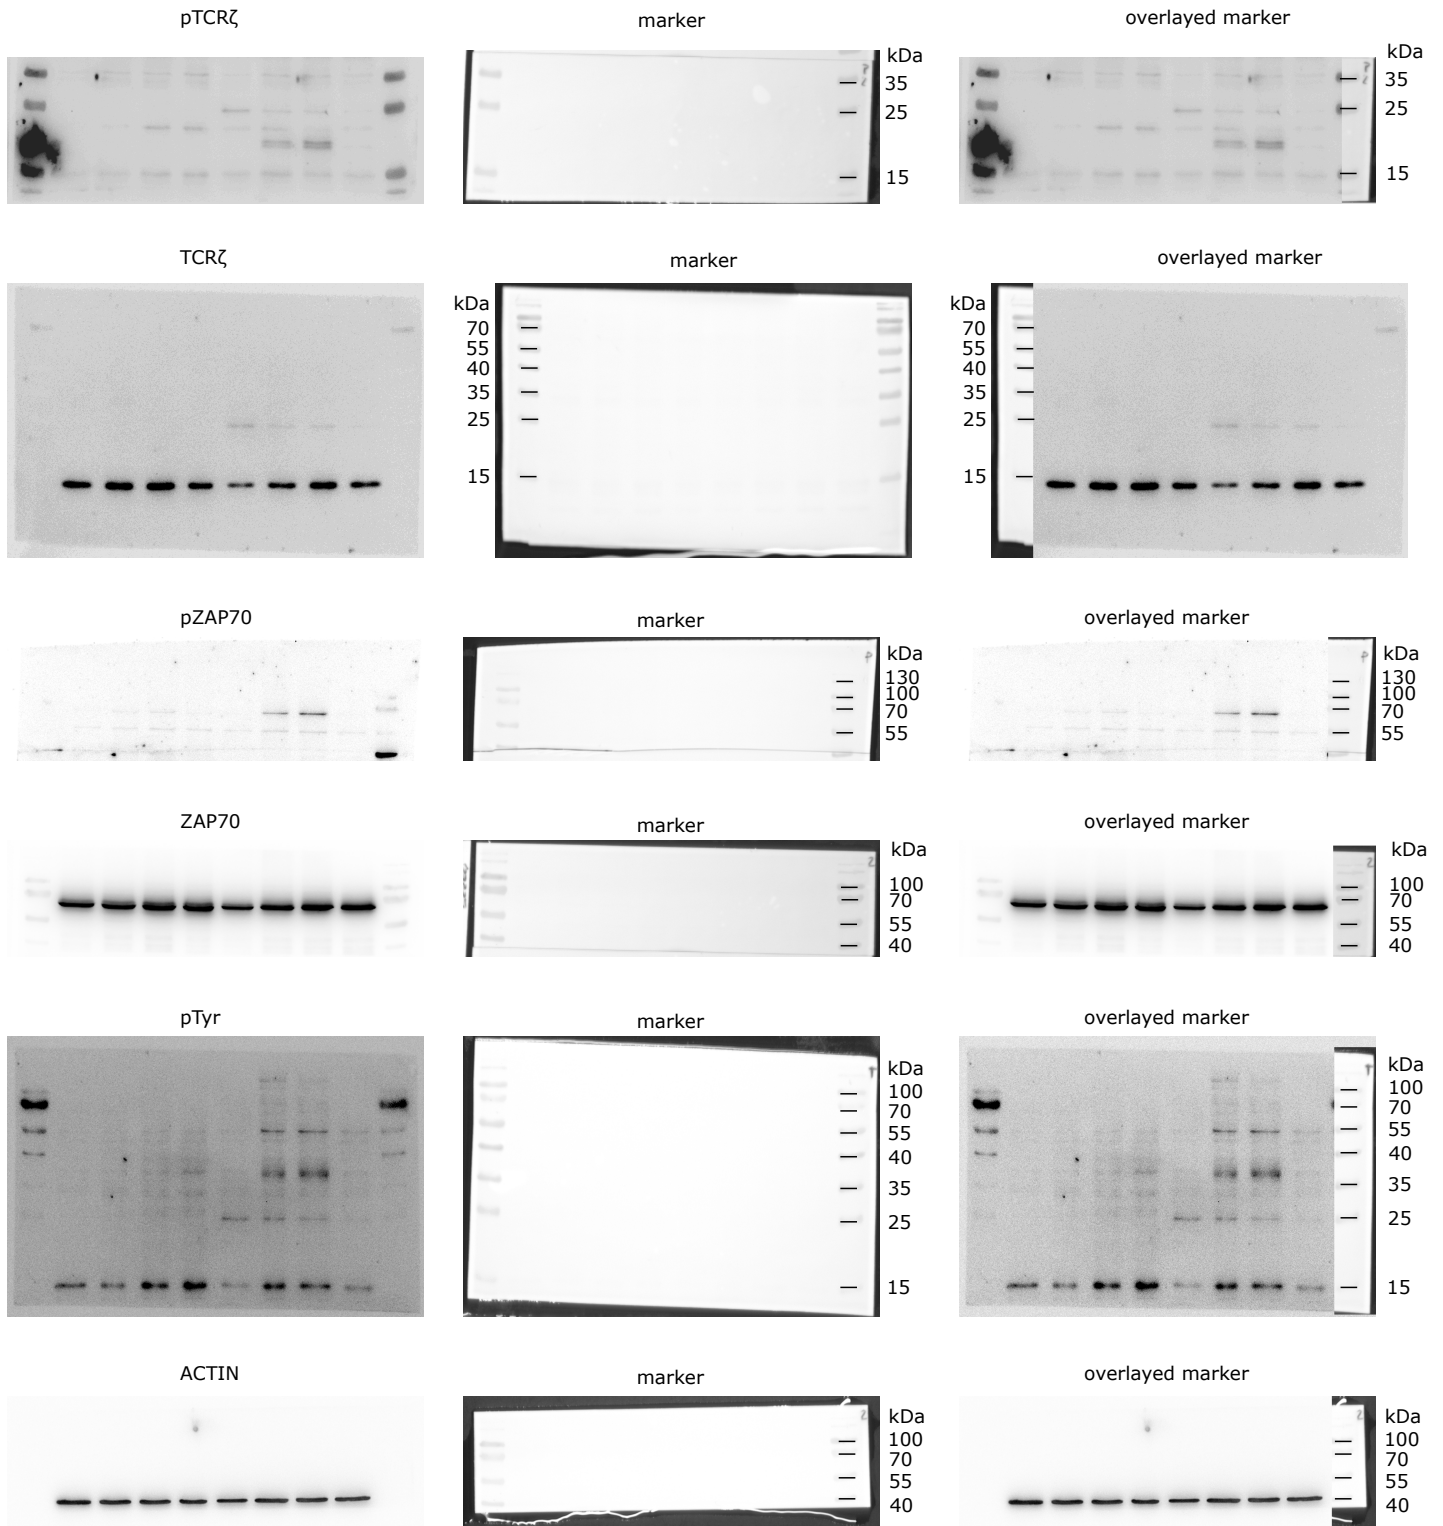

Supplement: 41590_2022_1366_MOESM15_ESM.pdf [file 41590_2022_1366_MOESM15_ESM.pdf]
